# Supplementary material for: Childhood adversities are different in Schizophrenic Spectrum Disorders, Bipolar Disorder and Major Depressive Disorder
Source: PubMed Central journal article supplement (PMC6300034; doi:10.1186/s12888-018-1972-8), 2018-12-19
Supplement: 12888_2018_1972_MOESM1_ESM.pdf [file 12888_2018_1972_MOESM1_ESM.pdf]

## CHILDHOOD EXPERIENCES OF CARE AND ABUSE

I would now like to ask you some questions about your childhood and adolescence. We are interested in different experiences you may have had before you were 17 years of age. Some of the experiences I want to ask about may bring back upsetting or painful memories, so if at any time you do not wish to answer a question please say so. Of course, all information you provide will be treated in the strictest confidence.

**1. Who were your main parent figures, before age 17?** [If necessary, continue on a separate sheet]

**0 =** No mother, father figure     
 **1 =** Natural mother, father     
 **2 =** Step-mother, father     
 **3 =** Grandmother, father     
 **4 =** Other

| 1. Family arrangement | A. Mother figure | B. Father figure | C. Your age at start |
|-----------------------|------------------|------------------|----------------------|
| 1. First              | O0 O1 O2 O3 O4   | O0 O1 O2 O3 O4   | 0                    |
| 2. Second             | O0 O1 O2 O3 O4   | O0 O1 O2 O3 O4   |                      |
| 3. Third              | O0 O1 O2 O3 O4   | O0 O1 O2 O3 O4   |                      |
| 4. Fourth             | O0 O1 O2 O3 O4   | O0 O1 O2 O3 O4   |                      |
| 5. Fifth              | O0 O1 O2 O3 O4   | O0 O1 O2 O3 O4   |                      |
| 6. Sixth              | O0 O1 O2 O3 O4   | O0 O1 O2 O3 O4   |                      |

**2. Did one or both of your parents die, before age 17?**

- 2.a. Did your mother die? O0 No    O1 Yes
- 2.b. Did your father die? O0 No    O1 Yes
- 2.c. If yes, how old were you when your mother died? □ □
- 2.d. If yes, how old were you when your father died? □ □

**3. Were you ever separated from a parent (longer than six months), before age 17?**

- 3.a. Separated from mother? O0 No    O1 Yes
- 3.b. Separated from father? O0 No    O1 Yes
- 3.c. If yes, how old were you at your first separation from mother? □ □
- 3.d. If yes, how old were you at your first separation from father? □ □
- 3.e. How long were you separated, in months? □ □

3.f. What was the main reason for the separation?

- O1 Parental Illness                      O2 Divorce, Separation                      O3 Work                      O4 Never knew parent  
 O5 Own illness                      O6 Boarding school                      O7 Migration                      O8 Other

3.g. Specify: .....

**Before the age of 17 years ...**

|                                                                                      | 0-11 years |        |                      | 12-16 years |        |                      |
|--------------------------------------------------------------------------------------|------------|--------|----------------------|-------------|--------|----------------------|
| 4. Did you ever change schools? (other than change from primary to secondary)        | O0 No      | O1 Yes | O2 Refused to answer | O0 No       | O1 Yes | O2 Refused to answer |
| 5. Were you ever expelled from school?                                               | O0 No      | O1 Yes | O2 Refused to answer | O0 No       | O1 Yes | O2 Refused to answer |
| 6. Did you ever run away from home? (i.e., stayed away for more than two nights)     | O0 No      | O1 Yes | O2 Refused to answer | O0 No       | O1 Yes | O2 Refused to answer |
| 7. Were you ever taken into care? (i.e., children's home, fostered)                  | O0 No      | O1 Yes | O2 Refused to answer | O0 No       | O1 Yes | O2 Refused to answer |
| 8. Were there ever times when your family was significantly short of money?          | O0 No      | O1 Yes | O2 Refused to answer | O0 No       | O1 Yes | O2 Refused to answer |
| 9. Were your basic needs ever neglected? (for food, clean clothing, etc.)            | O0 No      | O1 Yes | O2 Refused to answer | O0 No       | O1 Yes | O2 Refused to answer |
| 10. Were there ever frequent arguments or extreme tensions between your parents?     | O0 No      | O1 Yes | O2 Refused to answer | O0 No       | O1 Yes | O2 Refused to answer |
| 11. Were you ever tormented or treated cruelly by a parent or a member of household? | O0 No      | O1 Yes | O2 Refused to answer | O0 No       | O1 Yes | O2 Refused to answer |
| 12. Were you ever hit or slapped on a number of occasions, sufficient to cause harm? | O0 No      | O1 Yes | O2 Refused to answer | O0 No       | O1 Yes | O2 Refused to answer |
| 13. Ever had any unwanted sexual experiences?                                        | O0 No      | O1 Yes | O2 Refused to answer | O0 No       | O1 Yes | O2 Refused to answer |
| 14. Any adults could go to with problems or to discuss feelings?                     | O0 No      | O1 Yes | O2 Refused to answer | O0 No       | O1 Yes | O2 Refused to answer |
| 15. Others own age could go to with problems or to discuss feelings?                 | O0 No      | O1 Yes | O2 Refused to answer | O0 No       | O1 Yes | O2 Refused to answer |
| 16. Ever felt lonely for a significant period? (i.e., 6 months or more)?             | O0 No      | O1 Yes | O2 Refused to answer | O0 No       | O1 Yes | O2 Refused to answer |
